# Supplementary material
Source: HighWire-hosted journal article supplement (https://www.cmajopen.ca/highwire/filestream/80960/field_highwire_adjunct_files/0/2016-0068-1-at.pdf)
Supplement: 2016-0068-1-at.pdf [file 2016-0068-1-at.pdf]

**Appendix 1 (as supplied by the authors):  
Flow diagram of CHMS activity monitor participants – cycle 1<sup>1</sup>**

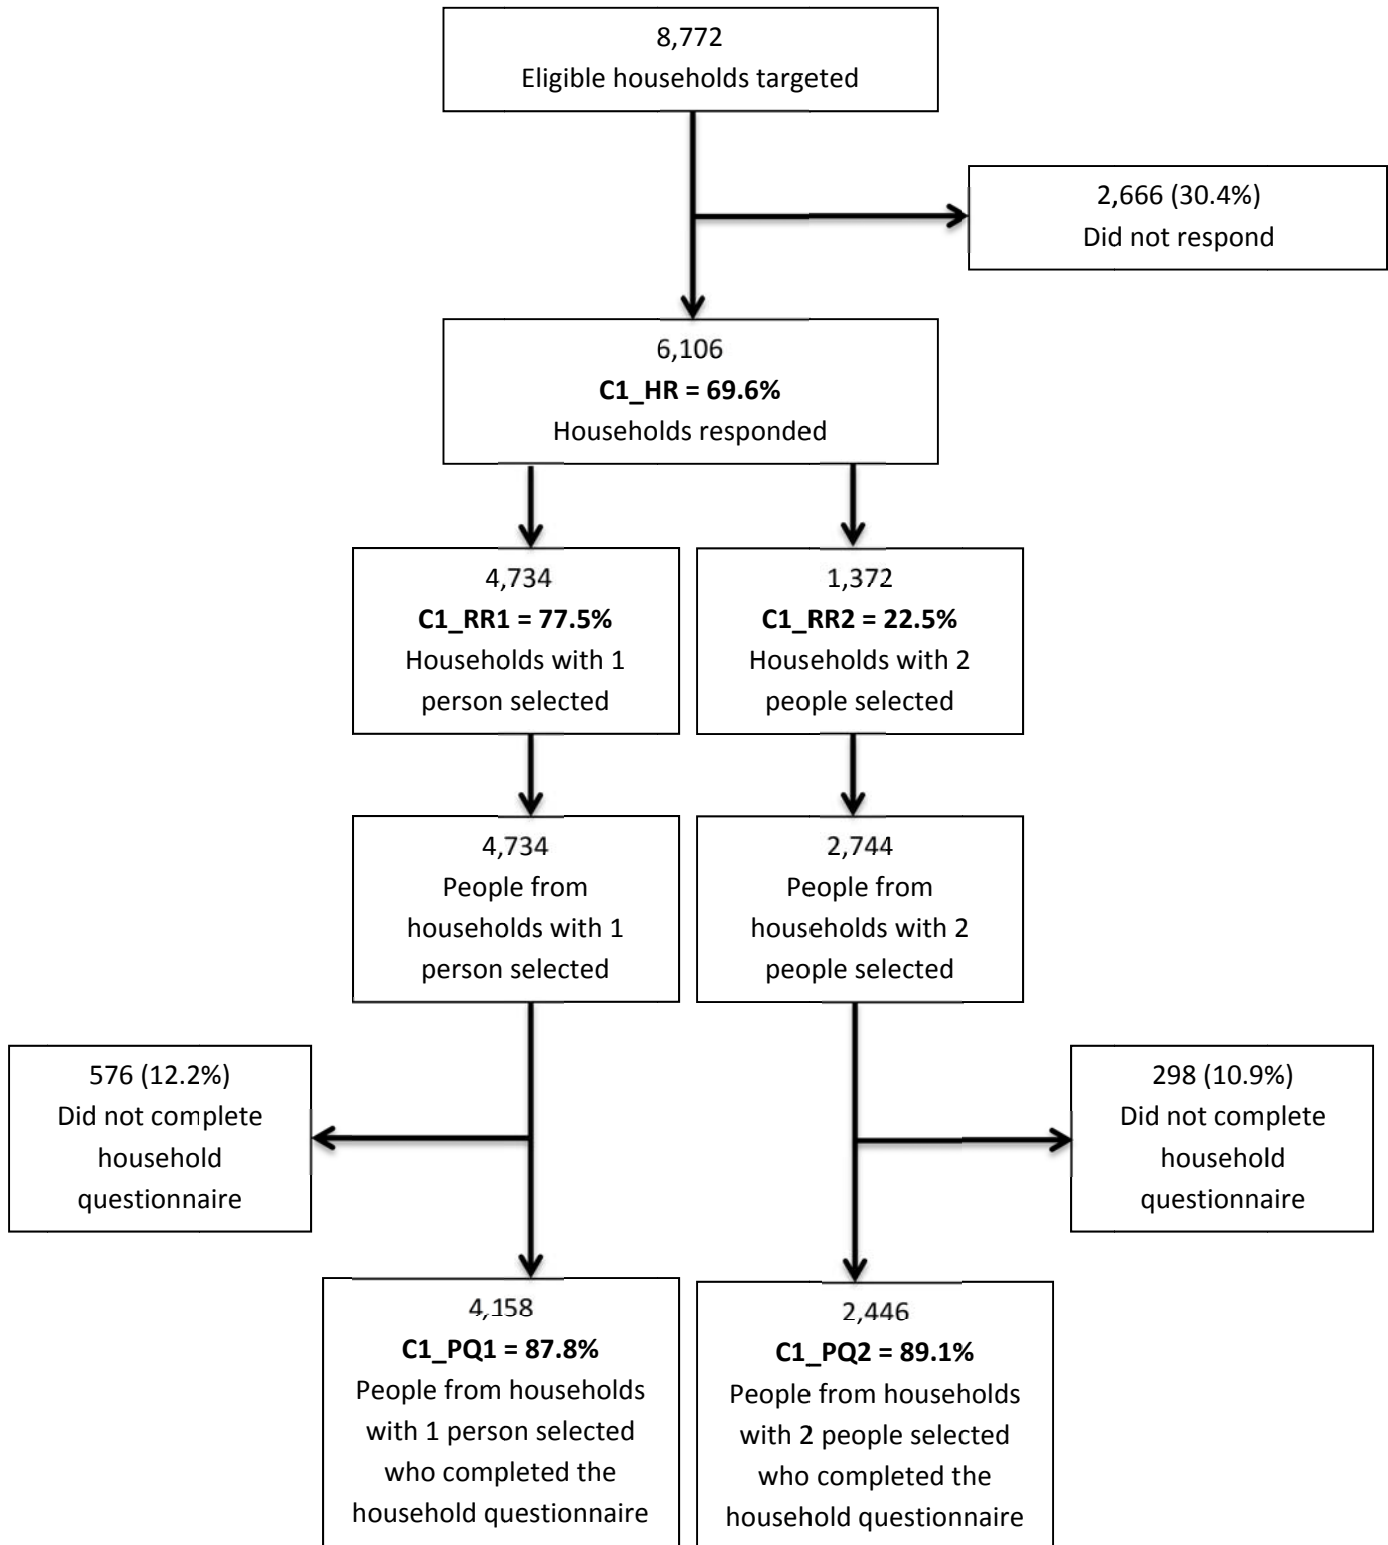

Appendix to: Thielman J, Manson H, Chiu M, et al. Residents of highly walkable neighbourhoods in Canadian urban areas do substantially more physical activity: a cross-sectional analysis. *CMAJ Open* 2016. DOI:10.9778/cmajo.20160068.

Copyright © 2016 The Author(s) or their employer(s).

To receive this resource in an accessible format, please contact us at [cmajgroup@cmaj.ca](mailto:cmajgroup@cmaj.ca).

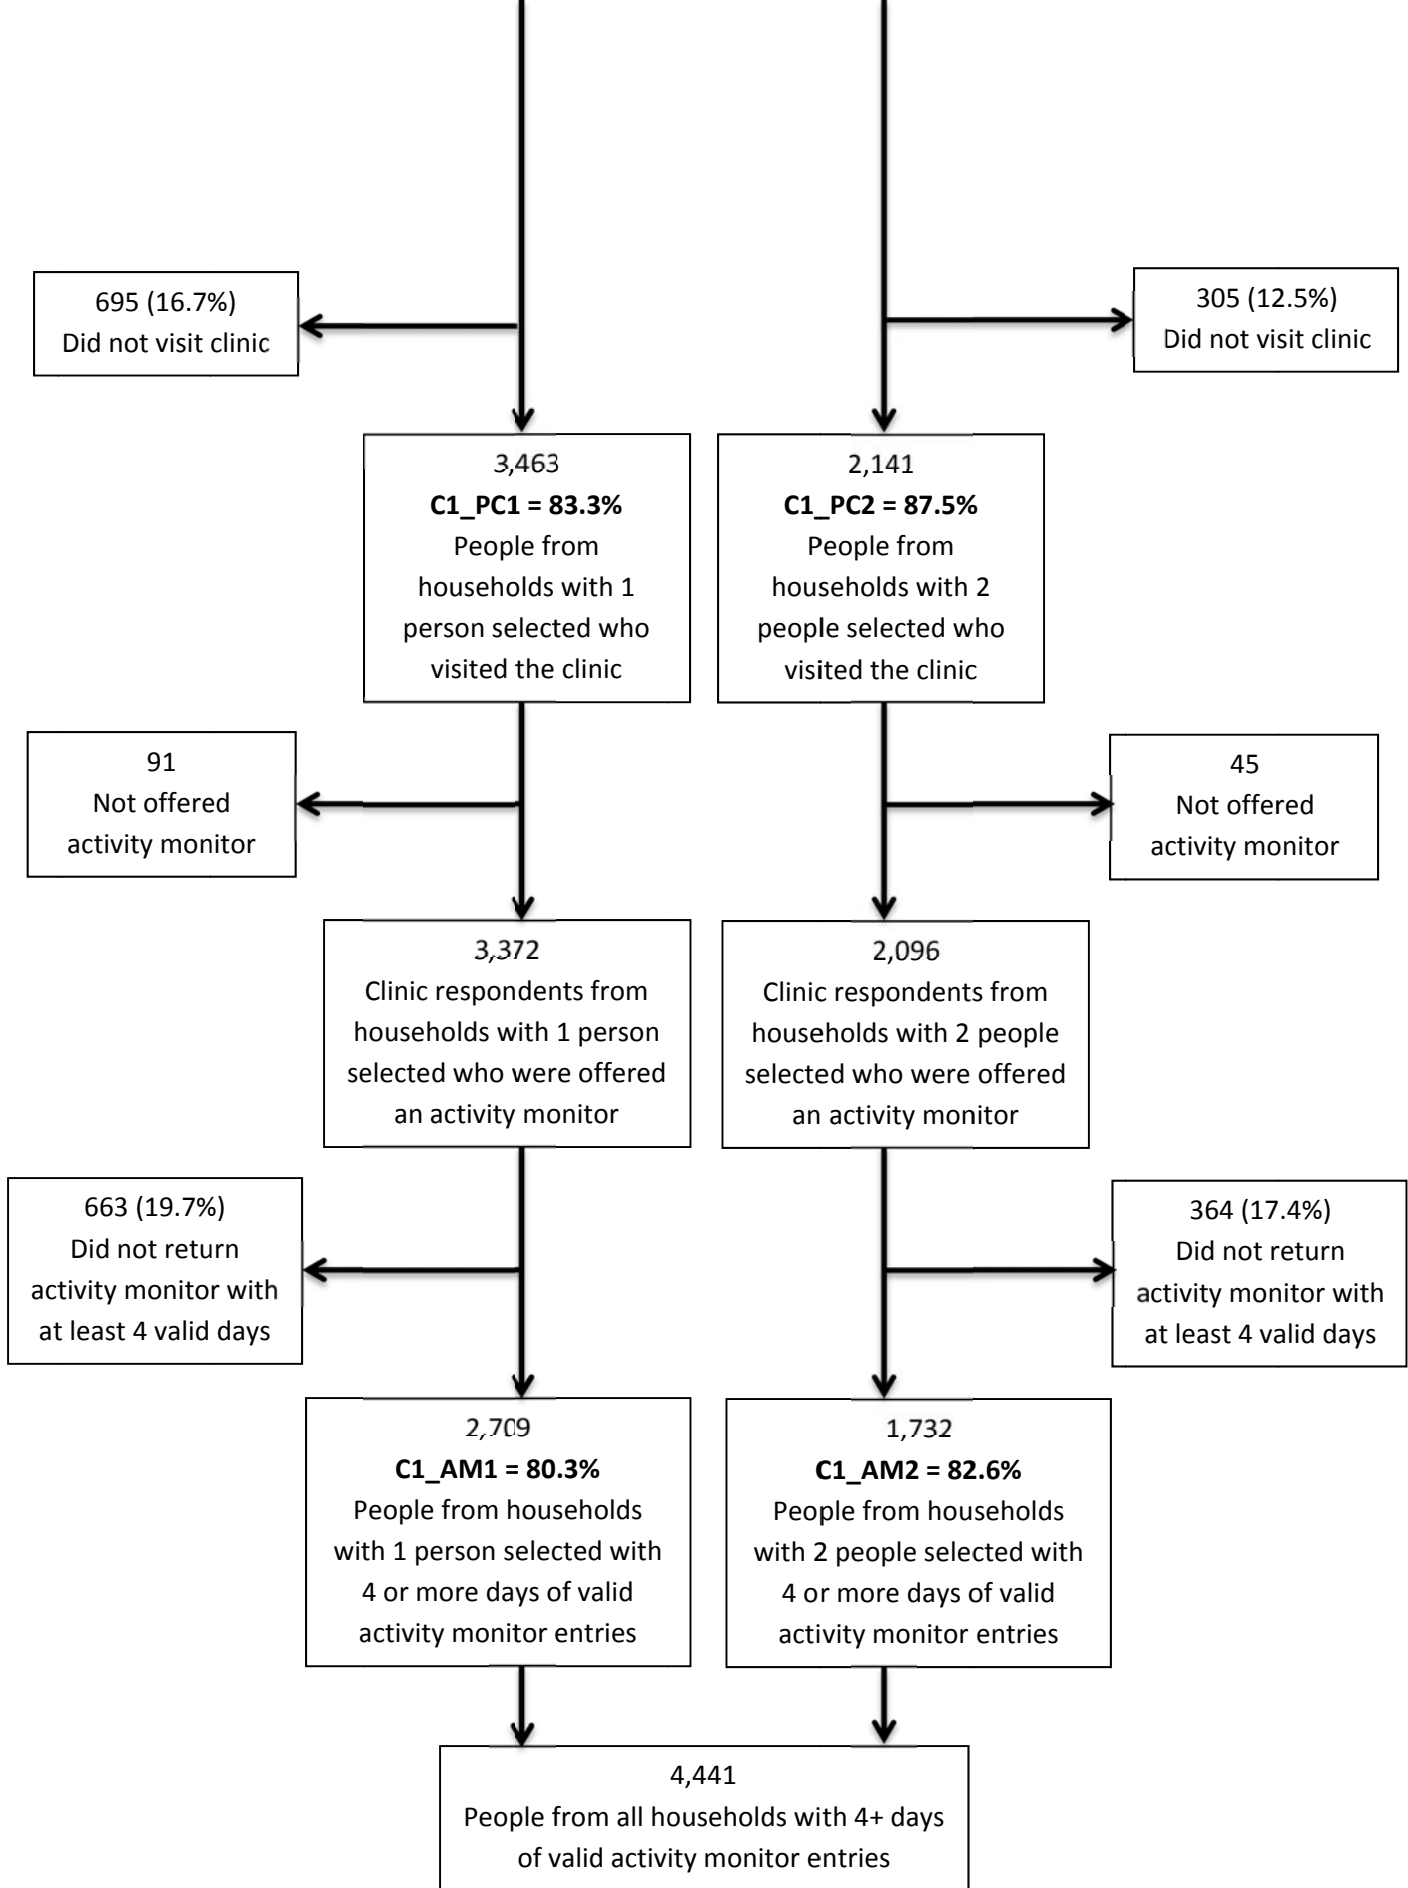

## Flow diagram of CHMS activity monitor participants – cycle 2<sup>2</sup>

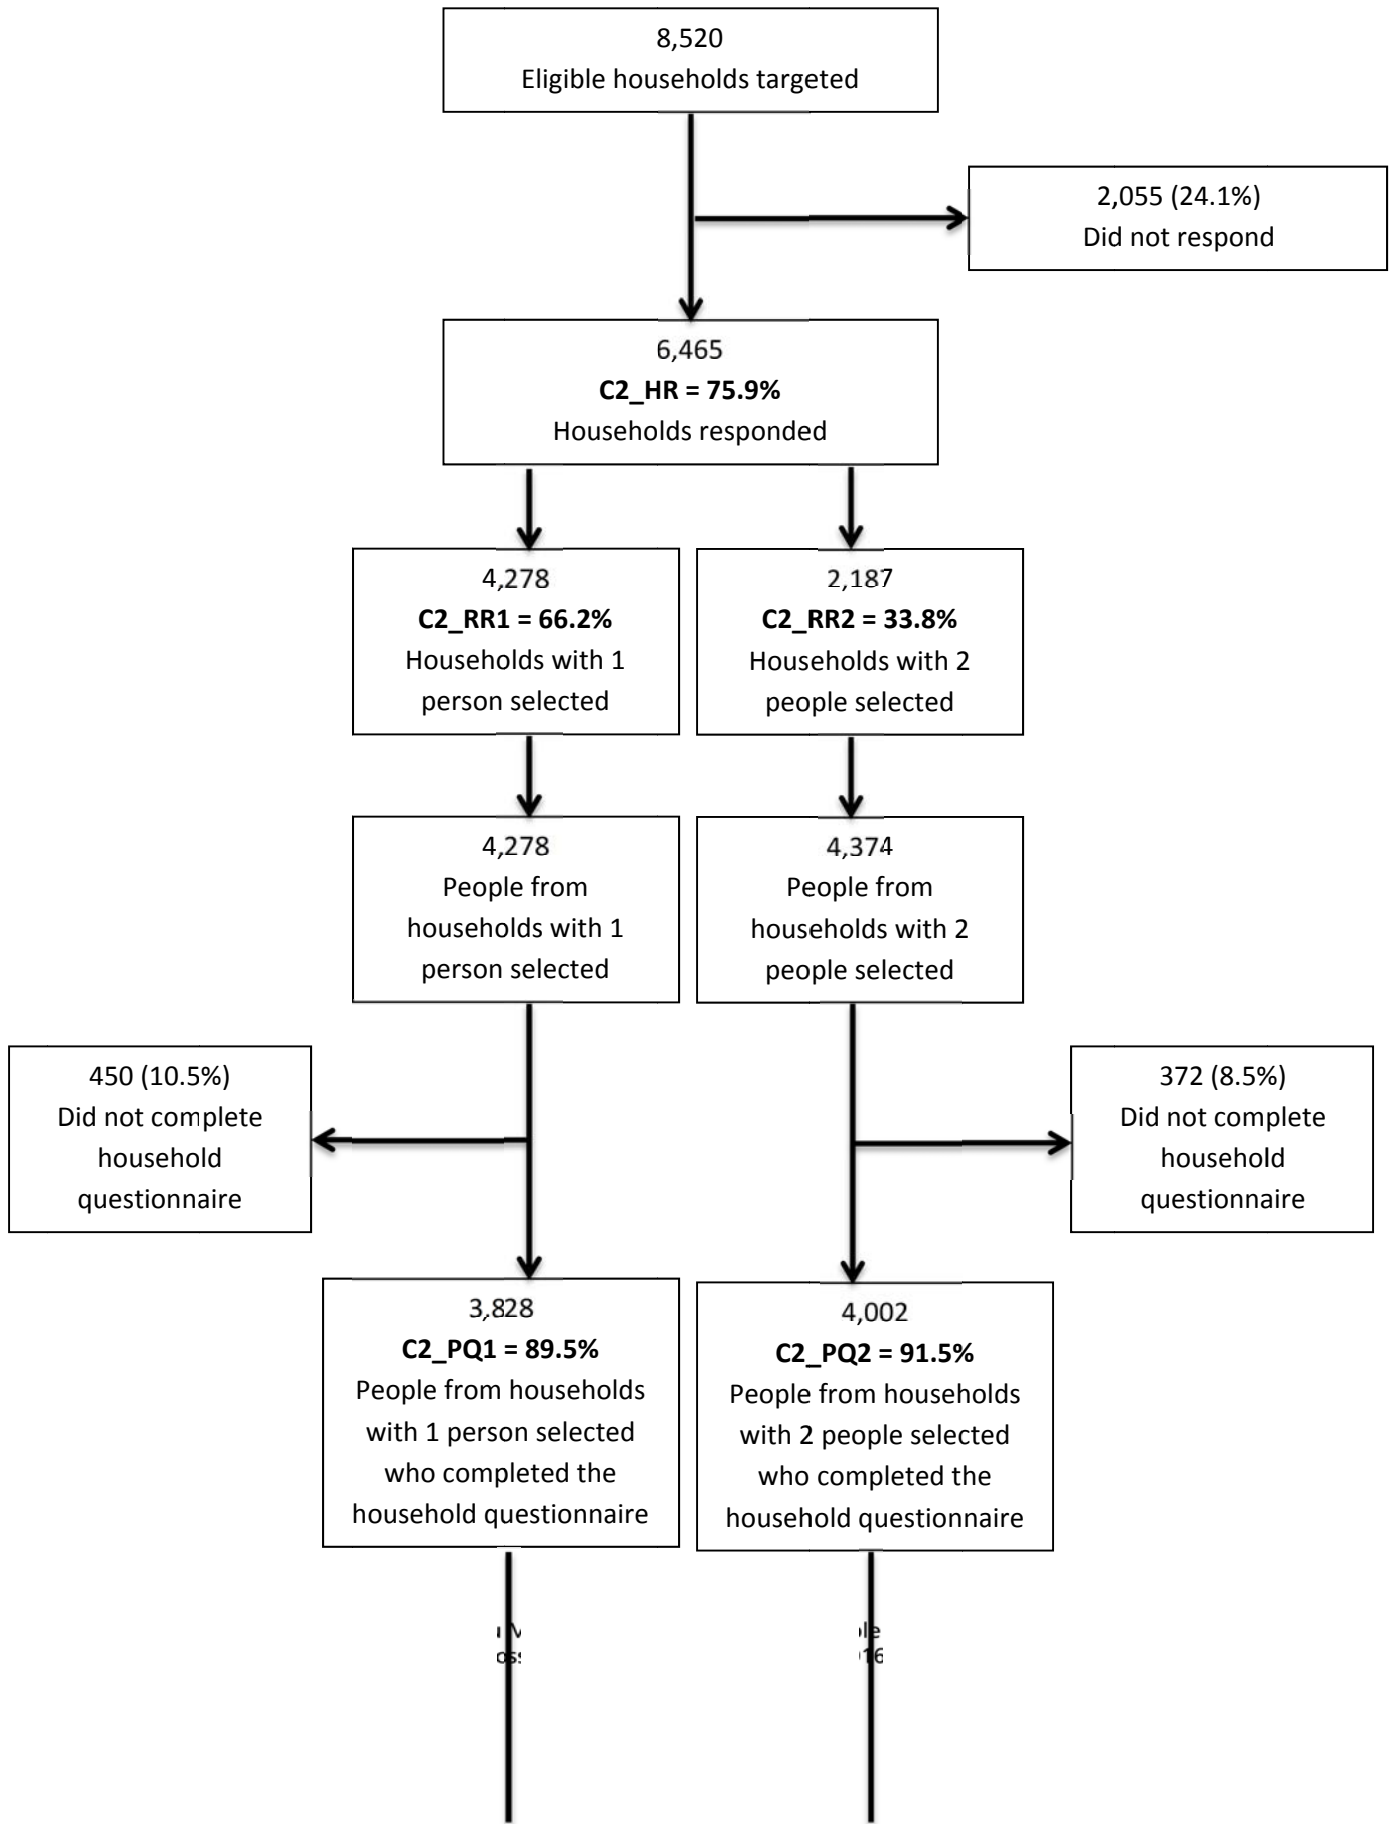

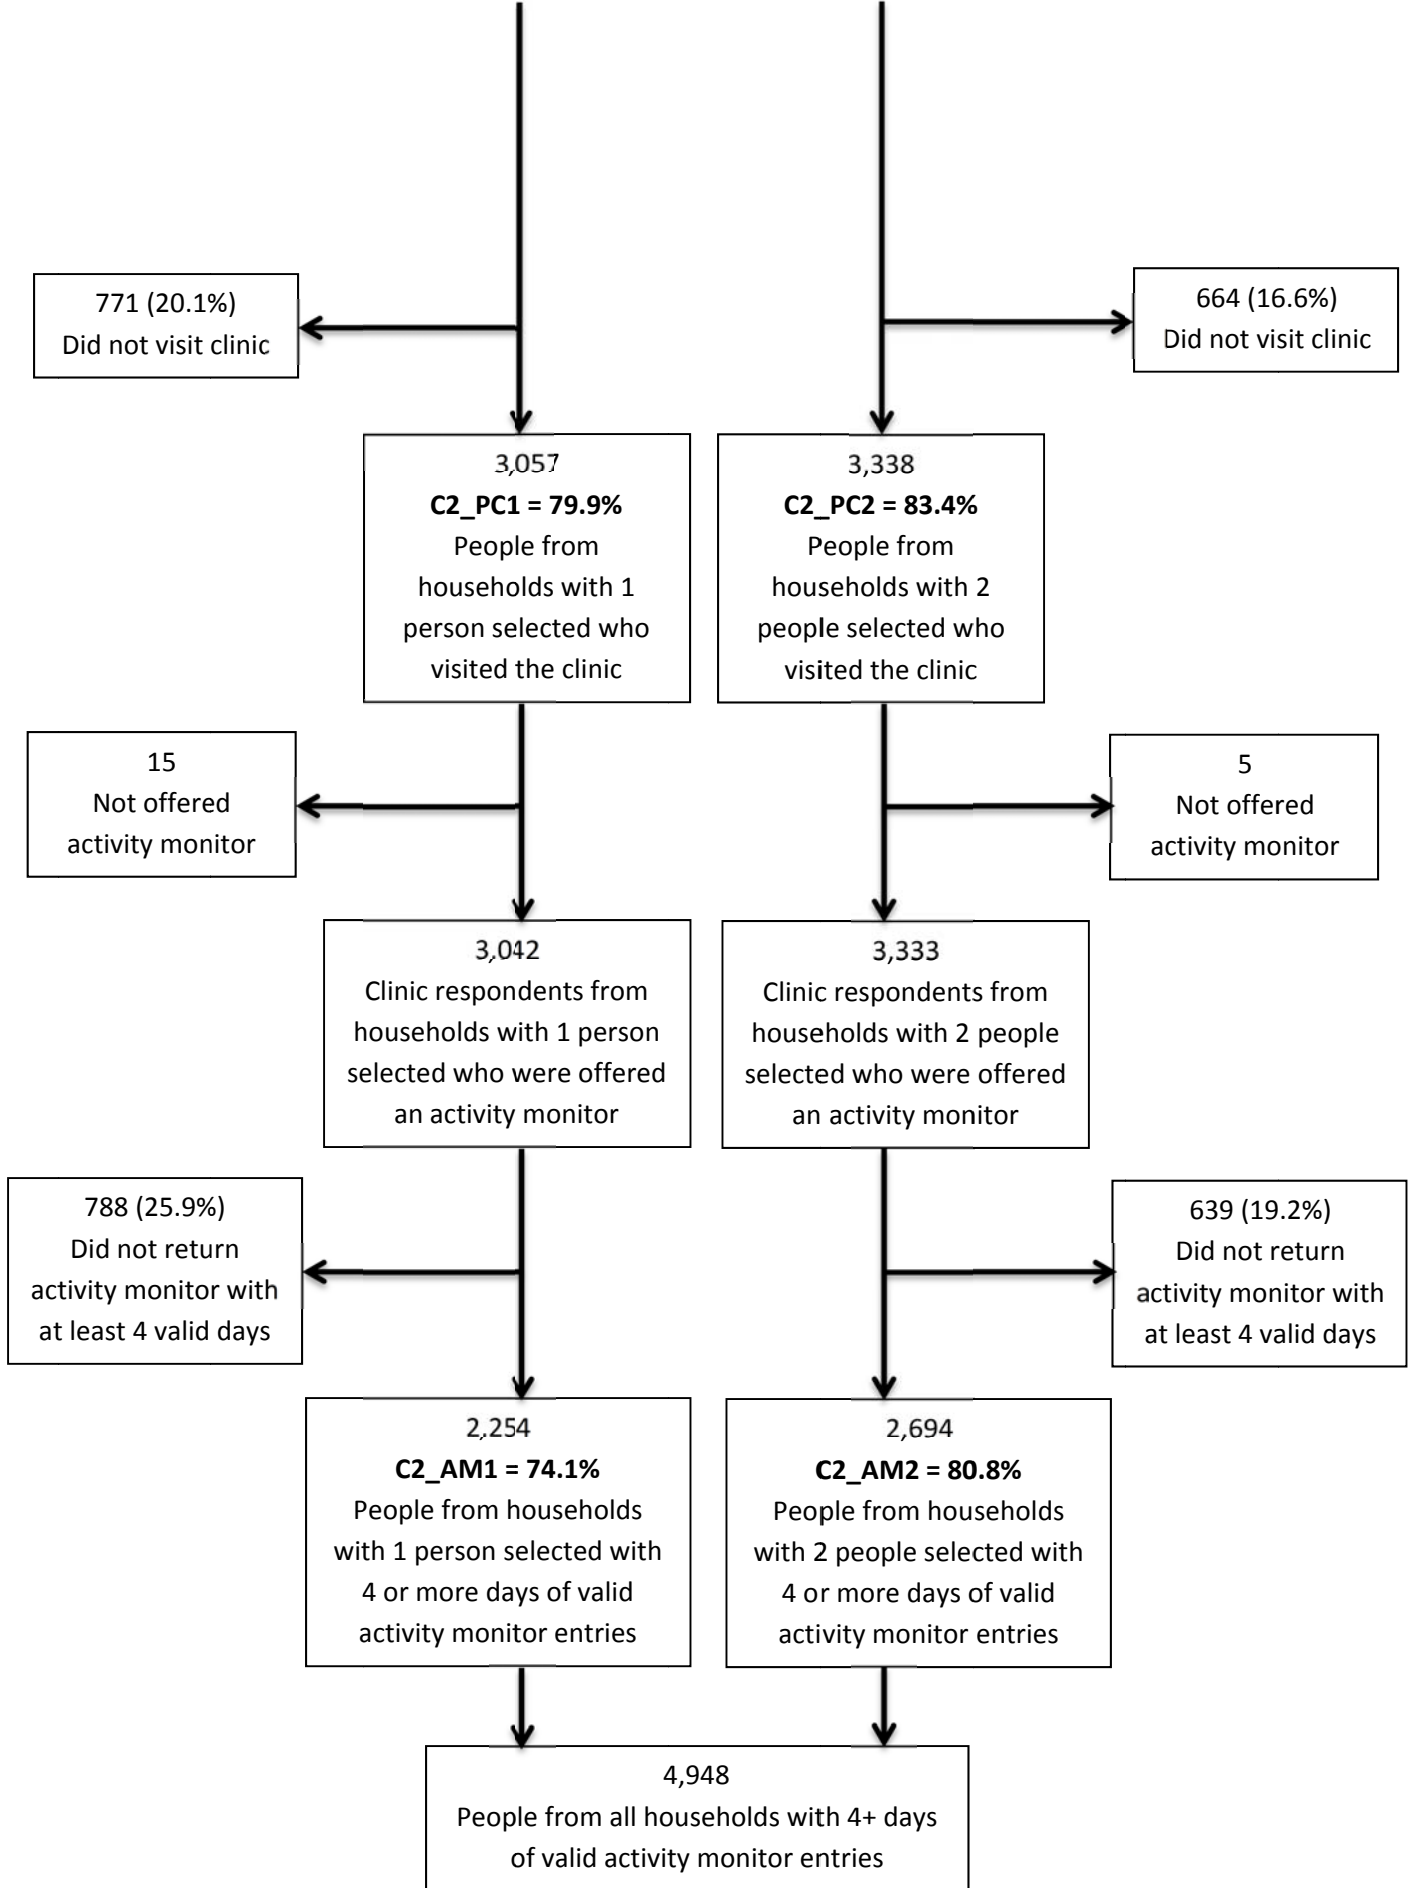

## CHMS activity monitor response rate

Activity monitor combined response rate for cycle 1 (where C1\_HR, C1\_RR1, C1\_PQ1, C1\_PC1, C1\_AM1, C1\_RR2, C1\_PQ2 and C1\_PC2, C1\_AM2 are defined in the flow charts):

$$\begin{aligned} &= C1\_AMCBRR = C1\_HR * [(C1\_RR1 * C1\_PQ1 * C1\_PC1 * C1\_AM1) + (C1\_RR2 * C1\_PQ2 * \\ &\quad C1\_PC2 * C1\_AM2)] \\ &= 0.696 * [(0.775 * 0.878 * 0.833 * 0.803) + (0.225 * 0.891 * 0.875 * 0.826)] \\ &= 0.696 * [0.455 + 0.145] \\ &= 0.418 \end{aligned}$$

Activity monitor combined response rate for cycle 2 (where C2\_HR, C2\_RR1, C2\_PQ1, C2\_PC1, C2\_AM1, C2\_RR2, C2\_PQ2 and C2\_PC2, C2\_AM2 are defined in the flow charts):

$$\begin{aligned} &= C2\_AMCBRR = C2\_HR * [(C2\_RR1 * C2\_PQ1 * C2\_PC1 * C2\_AM1) + (C2\_RR2 * C2\_PQ2 * \\ &\quad C2\_PC2 * C2\_AM2)] \\ &= 0.759 * [(0.662 * 0.895 * 0.799 * 0.741) + (0.338 * 0.915 * 0.834 * 0.808)] \\ &= 0.759 * [0.351 + 0.208] \\ &= 0.424 \end{aligned}$$

Average response rate across cycle 1 and cycle 2:

$$\begin{aligned} &= (C1\_AMCBRR + C2\_AMCBRR) / 2 \\ &= (0.418 + 0.424) / 2 \\ &= 0.421 \\ &= 42.1\% \end{aligned}$$

## References

1. Statistics Canada. Canadian Health Measures Survey Data User Guide: Cycle 1. 2011. [http://www23.statcan.gc.ca/imdb-bmdi/document/5071\\_D2\\_T1\\_V1-eng.htm#a5\\_3\\_2\\_2](http://www23.statcan.gc.ca/imdb-bmdi/document/5071_D2_T1_V1-eng.htm#a5_3_2_2). Accessed March 3, 2016.
2. Statistics Canada. Canadian Health Measures Survey (CHMS). Detailed information for August 2009 to November 2011 (Cycle 2). 2012. <http://www23.statcan.gc.ca/imdb/p2SV.pl?Function=getSurvey&Id=62444#a4>. Accessed March 3, 2016.
